# Supplementary material for: A Polyol-Mediated Fluoride Ions Slow-Releasing Strategy for the Phase-Controlled Synthesis of Photofunctional Mesocrystals
Source: MDPI journal article supplement (doi:10.3390/nano9010028), 2018-12-26
Supplement: s1 [file s1]

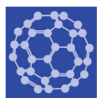

# A Polyol-Mediated Fluoride Ions Slow-Releasing Strategy for the Phase-Controlled Synthesis of Photofunctional Mesocrystals

Xianghong He\*, Yaheng Zhang, Yu Fu, Ning Lian, and Zhongchun Li

School of Chemistry and Environmental Engineering, Jiangsu University of Technology, Changzhou, Jiangsu 213001, China

\* Correspondence: hexh@jsut.edu.cn; Tel.: +86-519-8695-3269

The reason why  $\text{BminPF}_6$  rather than either 1-butyl-3-methylimidazolium tetrafluoroborate ( $\text{BmimBF}_4$ ) or  $\text{NH}_4\text{F}$  was chosen as the fluorine source is as follows. Cui et al. found that a mixture of cubic and hexagonal phase  $\text{NaYF}_4$  were obtained in a  $\text{BmimBF}_4$ -based system [1].  $\alpha\text{-NaYF}_4$  based nano-/microcrystals with an irregular shape instead of mesocrystals were obtained via a solvothermal method using polyol such as glycol, diethylene glycol, or ethylene glycol (EG) as medium, as well as  $\text{NH}_4\text{F}$  or  $\text{NaF}$  as the fluorine source [2, 3]. Qu et al. reported that the sample prepared at low temperature (down to  $80^\circ\text{C}$ ) via an EG-mediated solvothermal route using  $\text{NH}_4\text{F}$  as the fluoride source in the presence of trisodium citrate was made up of hexagonal  $\text{NaYF}_4$  microspheres [4]. In this work, we failed to obtain  $\text{NaYF}_4$  using  $\text{BmimBF}_4$  as the fluoride source. As exhibited in Figure S1, the sample synthesized with  $\text{BmimBF}_4$  was  $\text{YF}_3$  nanocrystals with an orthorhombic phase structure (PDF No. 70-1935). Similar case was also found by Cui et al. [5] and Xu et al. [6]. Hence, we chose  $\text{BminPF}_6$  rather than either  $\text{BmimBF}_4$  or  $\text{NH}_4\text{F}$  as the fluorine source.

## References

1. Meng He, Peng Huang, Chunlei Zhang, Feng Chen, Can Wang, Jiebing Ma, Rong He and Daxiang Cui, A general strategy for the synthesis of upconversion rare earth fluoride nanocrystals via a novel OA/ionic liquid two-phase system, *Chem. Commun.*, 2011, 47(33): 9510-9512.
2. Wei Yu, Xiaojing Wang, Nan Chen, Guoping Du, and Weijun Gui, A strategy to prepare highly redispersible and strongly luminescent  $\alpha\text{-NaYF}_4\text{:Eu}^{3+}$  hybrid nanostructures with multi-channel excitation, *CrystEngComm*, 2014, 16(15): 3214-3221.
3. Yang Wei, Fengqi Lu, Xinrong Zhang, Depu Chen, Polyol-mediated synthesis and luminescence of lanthanide-doped  $\text{NaYF}_4$  nanocrystal upconversion phosphors, *Journal of Alloys and Compounds* 2008, 455: 376–384.
4. Xuesong Qu, Guohui Pan, Hyun Kyoung Yang, Yeqing Chen, Jong Won Chung, Byung Kee Moon, Byung Chun Choi, Jung Hyun Jeong, and Kiwan Jang, Low-temperature synthesis of luminescent and mesoporous  $\beta\text{-NaYF}_4$  microspheres via polyol-mediated solvothermal route, *RSC Adv.*, 2013, 3: 4763–4770.
5. Meng He, Peng Huang, Chunlei Zhang, Jiebing Ma, Rong He, and Daxiang Cui, Phase- and Size-Controllable Synthesis of Hexagonal Upconversion Rare-Earth Fluoride Nanocrystals through an Oleic Acid/Ionic Liquid Two-Phase System, *Chemistry – A European Journal*, 2012, 18(19): 5954-5969.
6. Congcong Mi, Zhenhuang Tian, Can Cao, Zhijia Wang, Chuanbin Mao, Shukun Xu, Novel Microwave-Assisted Solvothermal Synthesis of  $\text{NaYF}_4\text{:Yb,Er}$  Upconversion Nanoparticles and Their Application in Cancer Cell Imaging, *Langmuir* 2011, 27: 14632–14637.

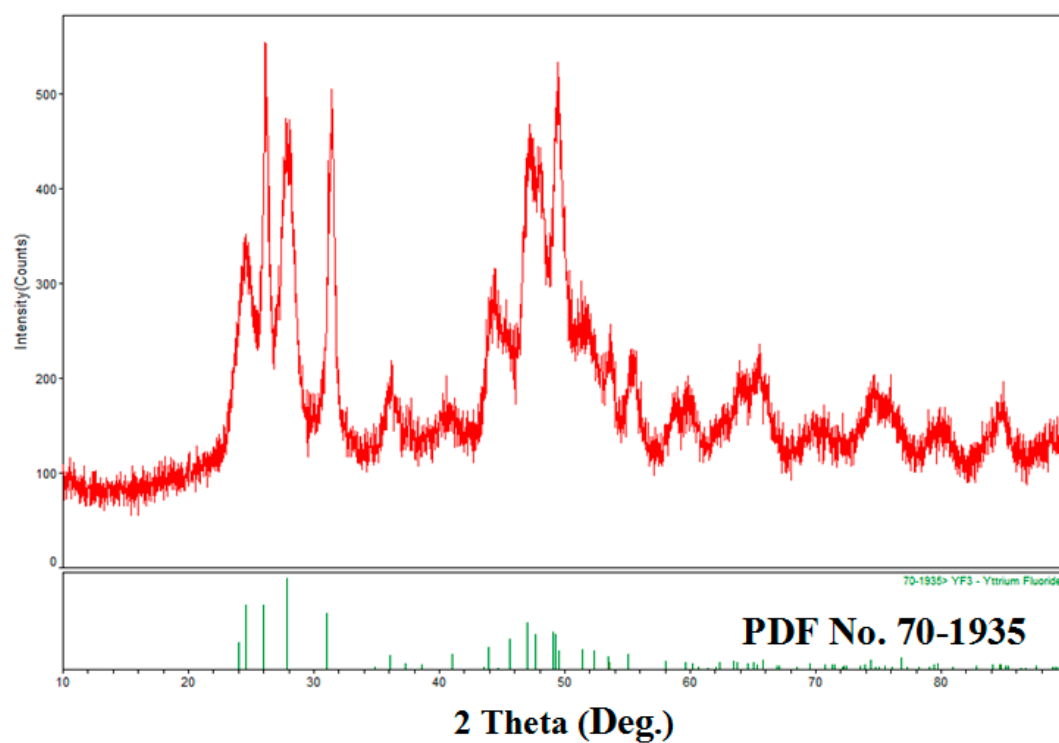

**Figure S1.** XRD pattern of the sample using BmimBF<sub>4</sub> as fluorine source (The bar represents the standard cards PDF#70-1935 for YF<sub>3</sub>).

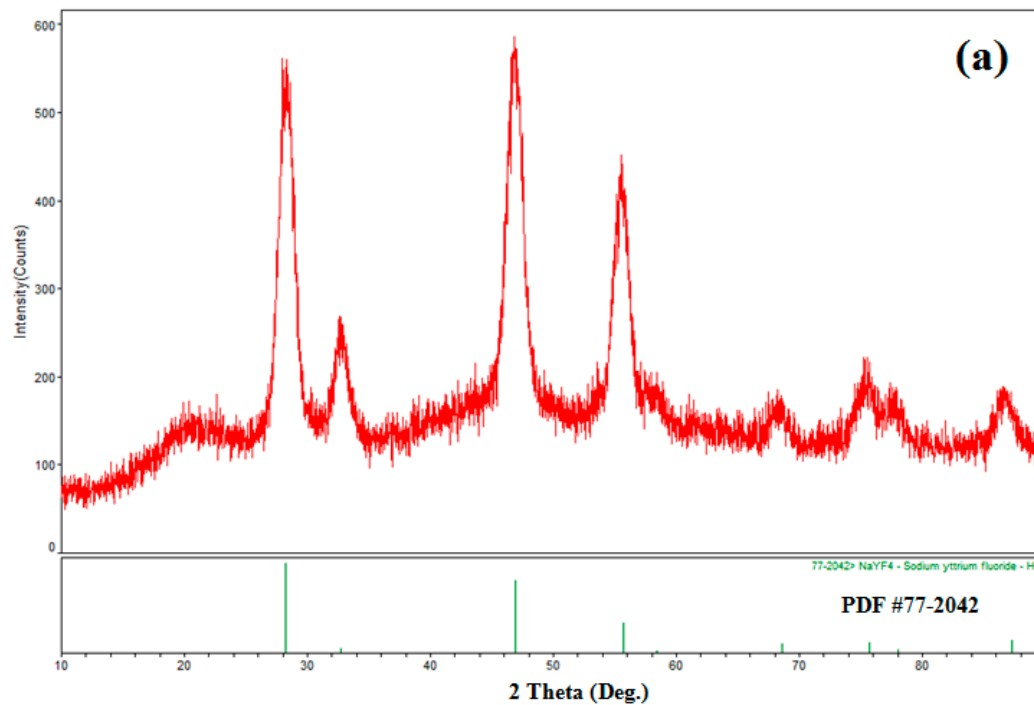

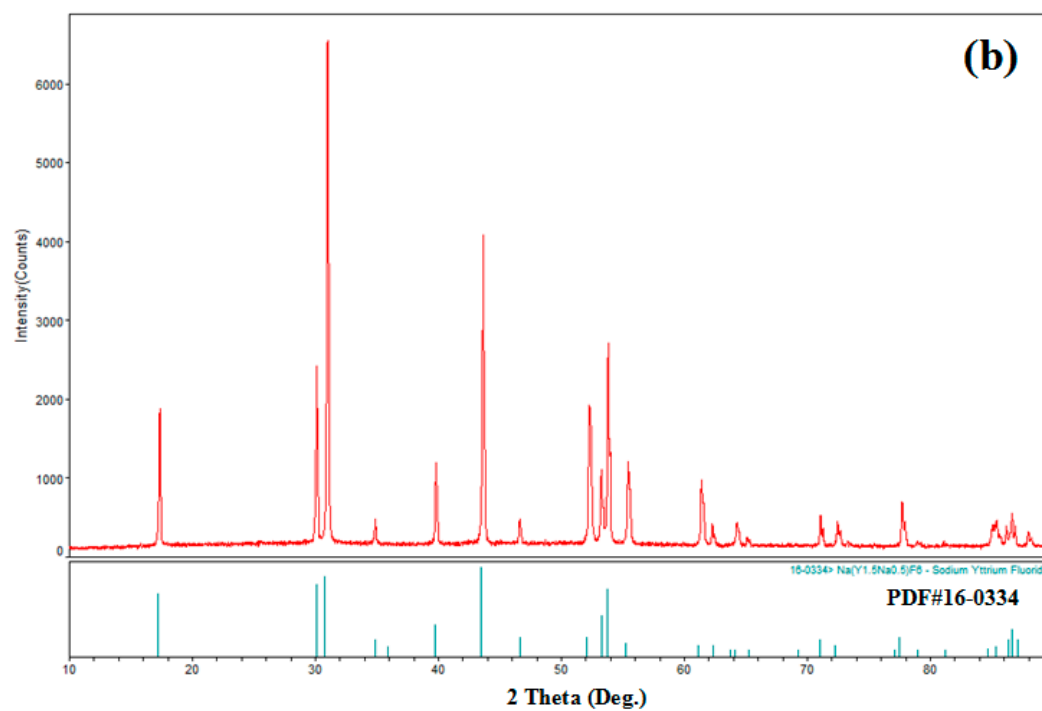

**Figure S2.** XRD patterns of NYF:Yb<sup>3+</sup>,Er<sup>3+</sup> (20/2 mol%) NCs via a LSS method at (a) 120 °C and (b) 220 °C (The bars in (a) and (b) represent the standard cards PDF#77-2042 and #PDF16-0334, respectively).
